# Supplementary material
Source: PubMed Central journal article supplement (PMC9453853)
Supplement: NIHMS1804995-supplement-5.pdf [file NIHMS1804995-supplement-5.pdf]

## Supplementary Figures

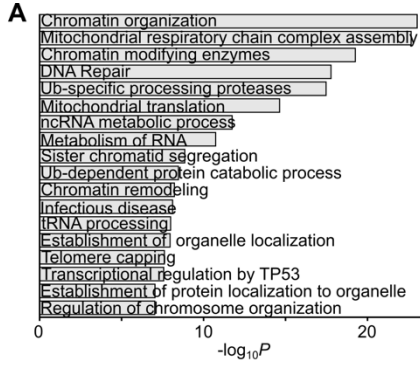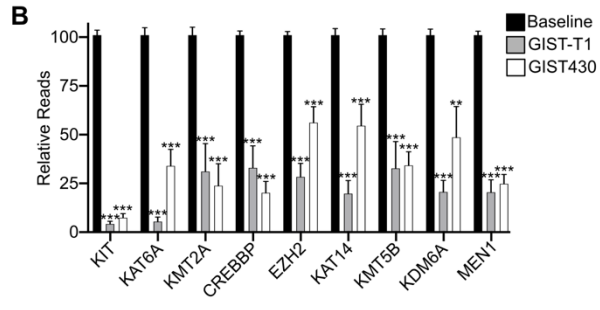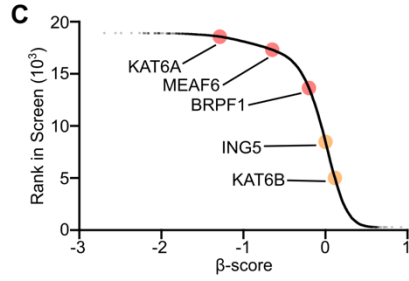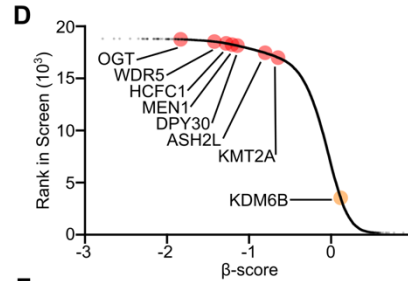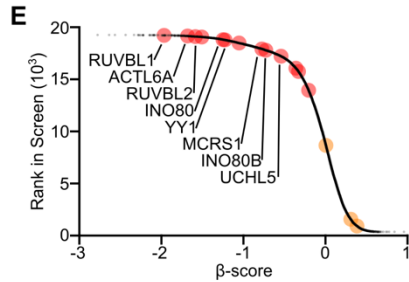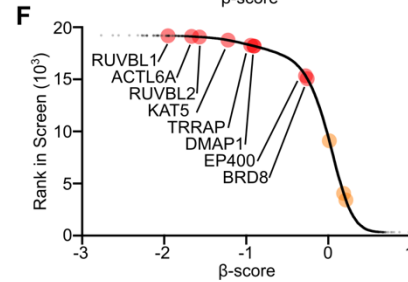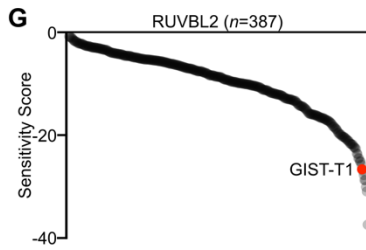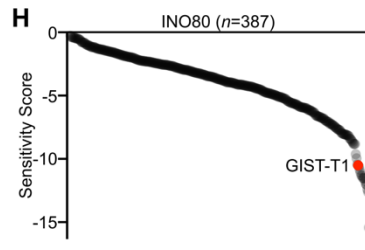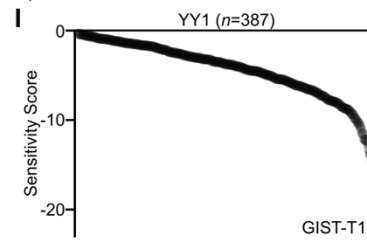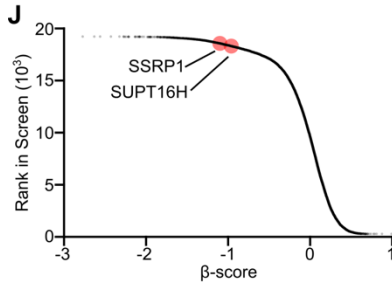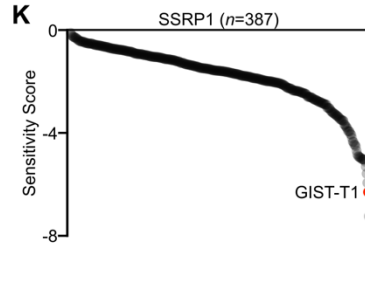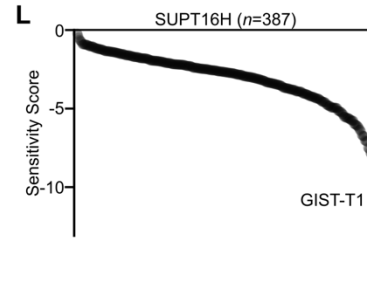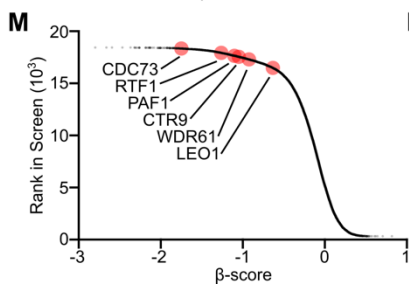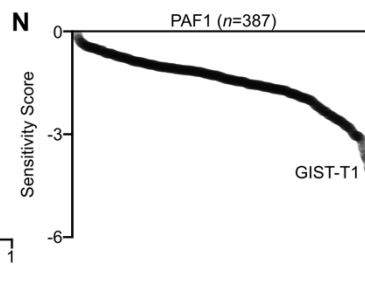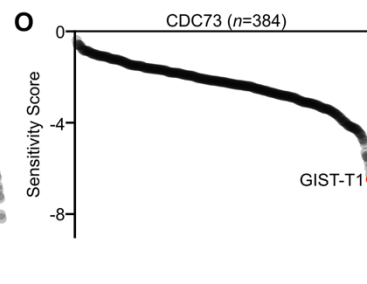

**Figure S1. Unique GIST dependencies.** **A**, Plot showing the top 18 significantly enriched gene ontology terms among genes uniquely essential to GIST. **B**, Relative reads for the top 8 sgRNAs targeting the indicated genes in GIST-T1 or GIST430, normalized to baseline plasmid library ( $n=2$  per sgRNA). Data were analyzed by one-way ANOVA with Dunnett's multiple comparisons test, compared to Baseline; \*\*\*,  $P<0.001$ ; \*\*,  $P<0.01$ . **C**, Plot of rank in screen and  $\beta$ -score highlighting MOZ complex members and KAT6B as comparator; statistically significant  $\beta$ -scores are indicated in red, and non-significant in orange. **D**, Plot of rank in screen and  $\beta$ -score highlighting Menin-MLL complex members. **E**, Plot of rank in screen and  $\beta$ -score highlighting INO80 complex members. **F**, Plot of rank in screen and  $\beta$ -score highlighting NuA4 histone acetyltransferase complex members. **G-I**, Ranked Sensitivity Score from Project Drive cell lines ( $n=387$ ) for select members of the INO80 and NuA4 complexes, with GIST-T1 highlighted in red. **J**, Plot of rank in screen and  $\beta$ -score highlighting FACT complex members. **K-L**, Ranked Sensitivity Score from Project Drive cell lines ( $n=387$ ) for members of the FACT complex, with GIST-T1 highlighted in red. **M**, Plot of rank in screen and  $\beta$ -score highlighting PAF1 complex members. **N-O**, Ranked Sensitivity Score from Project Drive cell lines ( $n=387$ ) for select members of the PAF1 complex, with GIST-T1 highlighted in red.

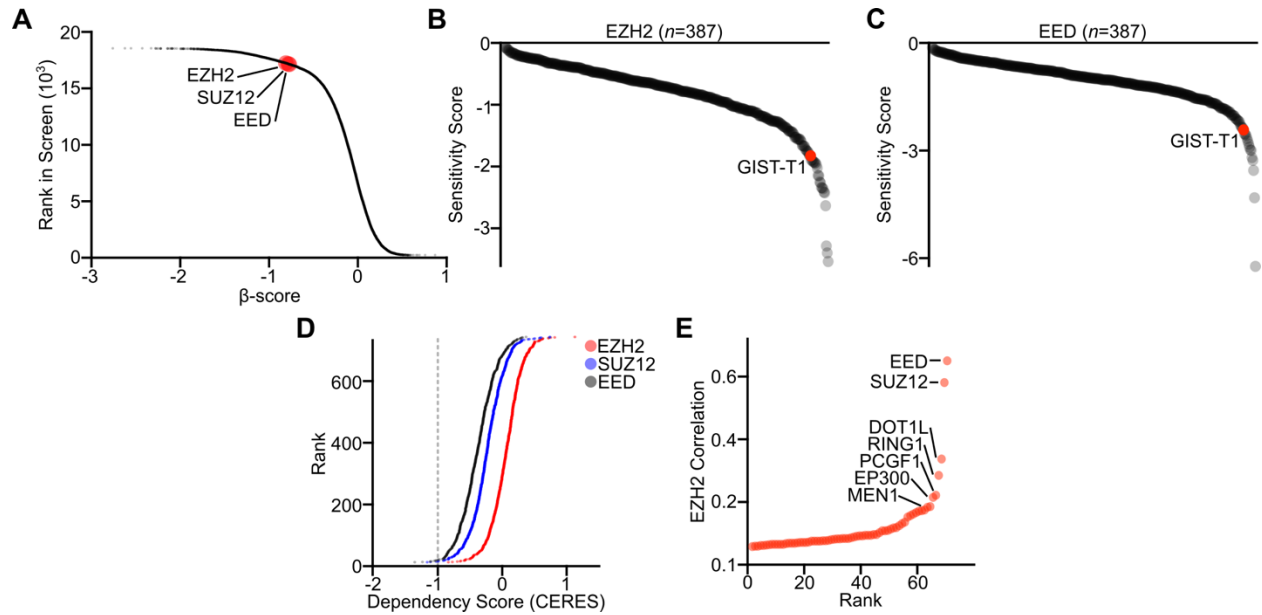

**Figure S2. PRC2 complex dependency in GIST.** **A**, Plot of rank in screen and  $\beta$ -score highlighting core PRC2 complex members. **B-C**, Ranked Sensitivity Score from Project Drive cell lines ( $n=387$ ) for select members of the PRC2 complex, with GIST-T1 highlighted in red. **D**, Plot of rank and CERES dependency score for EZH2 complex members across DepMap cell lines ( $n=726$ ), with the dotted line at -1 indicating significant dependency. **E**, Top 70 gene dependency correlations of EZH2 in DepMap. Co-dependent chromatin modifying enzymes and complex members are labeled.

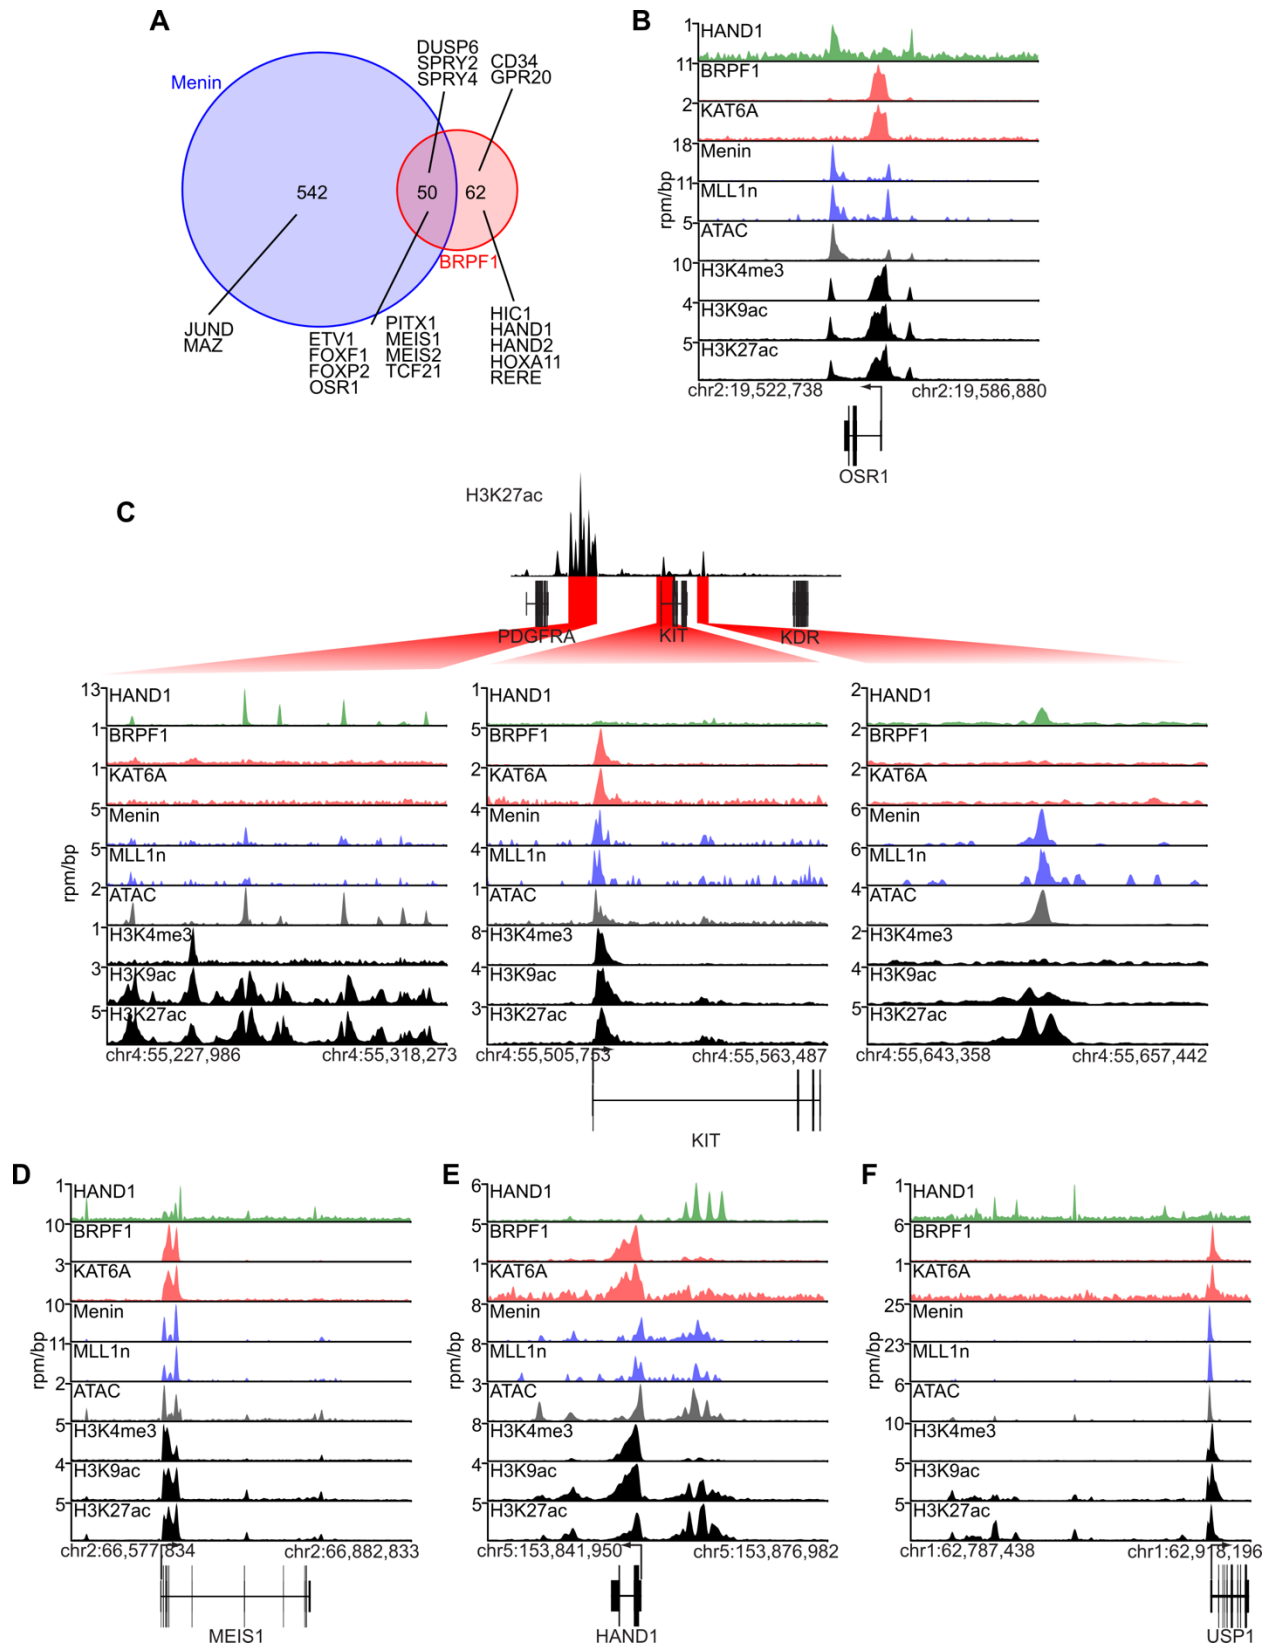

**Figure S3. Menin-MLL and MOZ complex localization in GIST.** **A**, Overlap of enriched regions between Menin and BRPF1, with select GIST-associated genes indicated. **B-F**, Tracks showing regions of genomic occupancy of the TF HAND1, MOZ complex members BRPF1 and KAT6A, Menin-MLL complex members Menin and MLL1n and histone marks H3K4me3, H3K9ac and H3K27ac at the *OSR1*, *KIT*, *MEIS1*, *HAND1* and *USP1* loci.

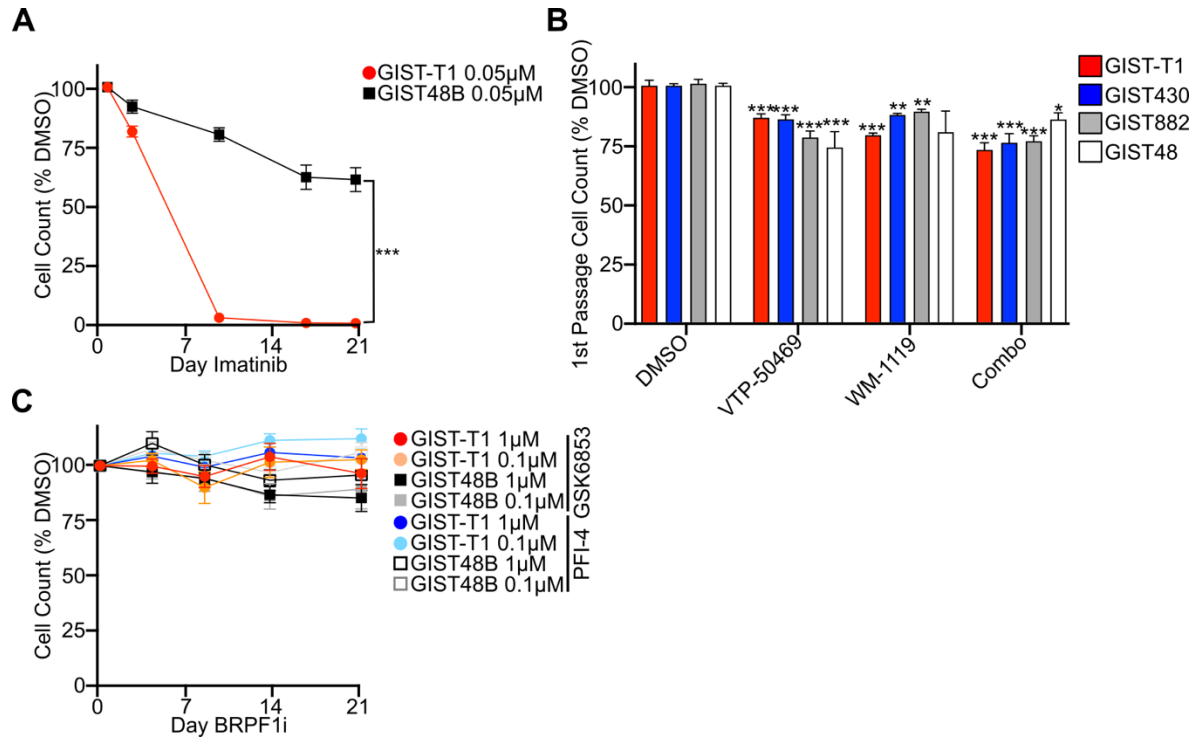

**Figure S4. KAT6A, Menin and BRPF1 inhibition.** **A**, Growth over time assay following treatment of GIST-T1 or GIST48B with 50 nM imatinib ( $n=5$  per condition). Data were analyzed by two-way ANOVA, compared to GIST48B; \*\*\*,  $P<0.0001$ . **B**, DMSO-normalized cell count after the first passage of slowly growing GIST cell lines GIST430 (day 6), GIST882 (day 12) and GIST48 (day 12) in comparison to GIST-T1 (day 4). Cells were treated with VTP-50469 at 0.5  $\mu\text{M}$ , WM-1119 at 1  $\mu\text{M}$  or the combination with each drug at 0.1  $\mu\text{M}$  ( $n=5-6$  per condition). The first passage cell count was used to demonstrate on-target drug toxicity comparable to GIST-T1, as GIST882 and GIST48 cell lines replat poorly in this assay. Data were analyzed by one-way ANOVA with Dunnett's multiple comparisons test; compared to DMSO control \*\*\*,  $P<0.001$ ; \*\*,  $P<0.01$ ; \*,  $P<0.05$ . **C**, Growth over time assay treating GIST-T1 or GIST48B cells with selective BRPF1 inhibitors GSK6853 or PFI-4 at the indicated doses. No significant differences were observed by two-way ANOVA compared to DMSO control.

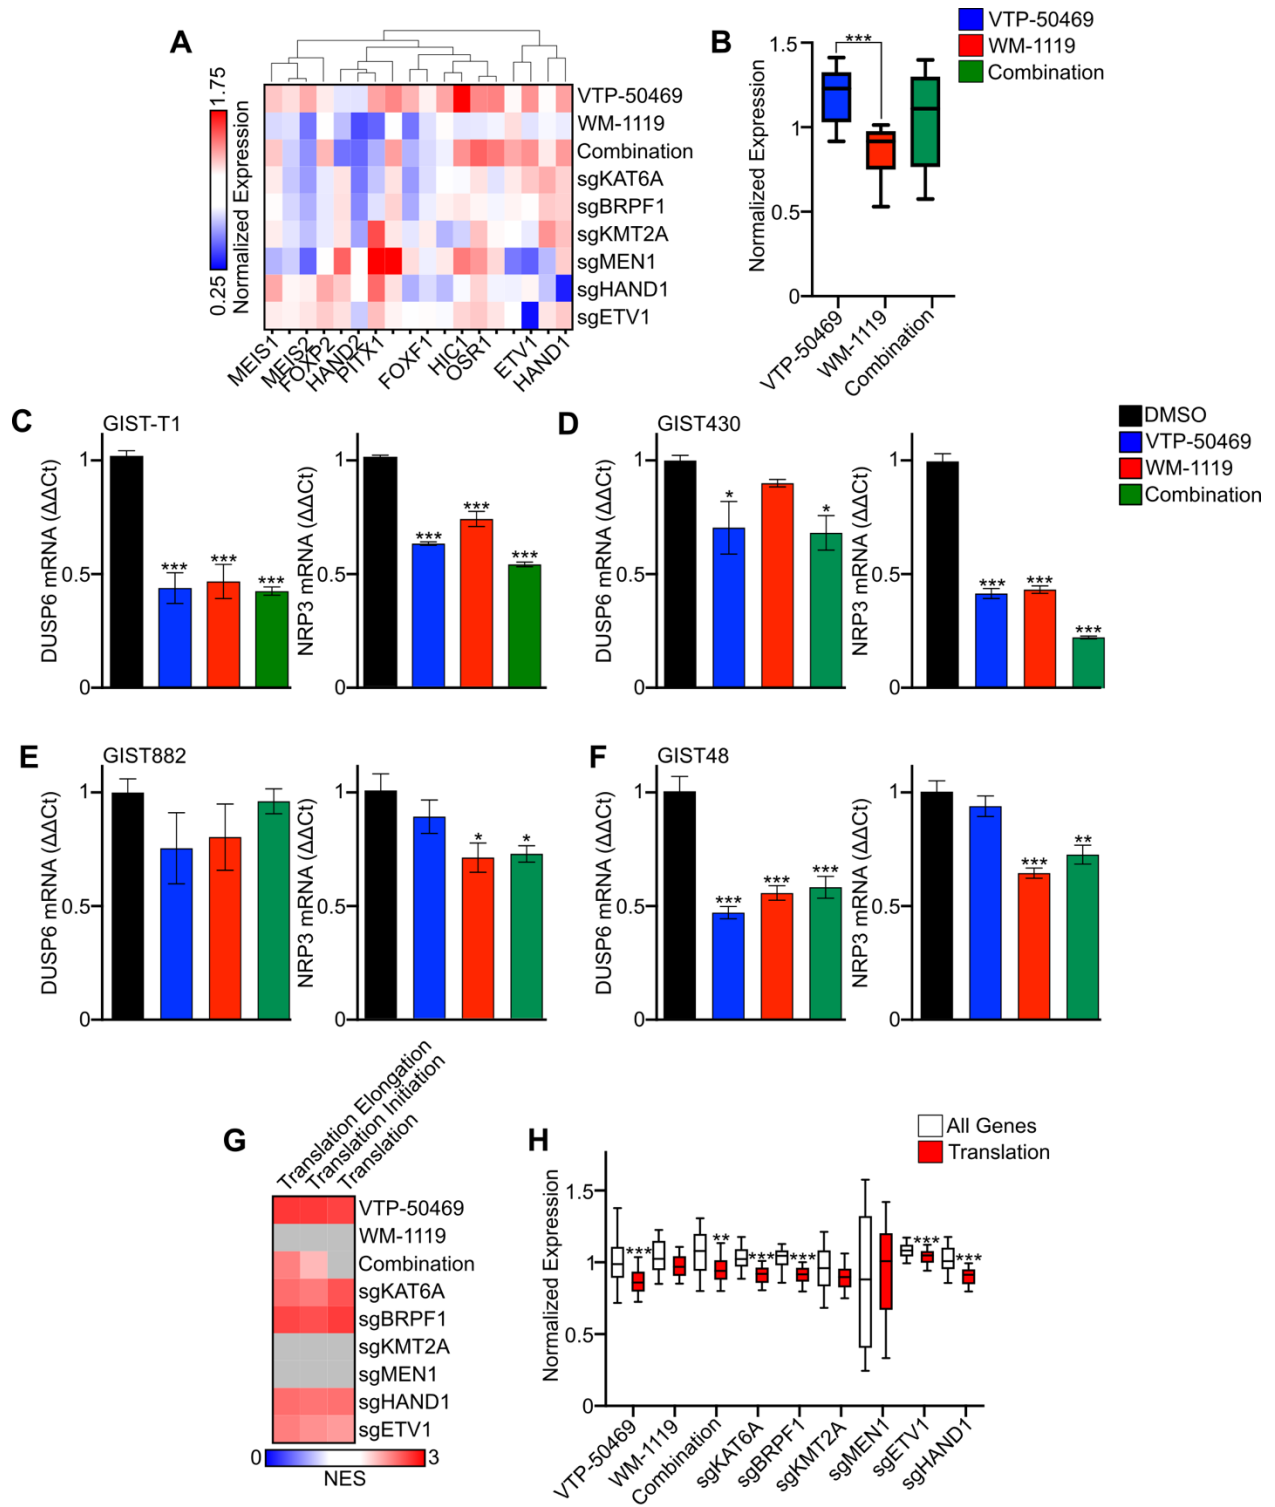



**Figure S5. Transcriptional effects of MOZ and Menin disruption.** **A**, Heatmap of control-normalized expression of GIST-associated TFs (10) in response to drug or sgRNA treatment. **B**, DMSO-normalized expression of 18 GIST-associated TFs in the indicated drug treatment ( $n=4$  per condition). Data in were analyzed by one-way ANOVA with Tukey's multiple comparisons test, compared to VTP-50469; \*\*\*, $P<0.001$ . **C-F**, Relative mRNA level by qRT-PCR of negative regulator of KIT signaling DUSP6 and HAND1- and SE-associated gene NPR3 in the indicated GIST cell lines treated for 5 days with VTP-50469 at 0.5  $\mu\text{M}$ , WM-1119 at 1  $\mu\text{M}$  or the combination with each drug at 0.1  $\mu\text{M}$  ( $n=3-4$  per group). Data in were analyzed by one-way ANOVA with Dunnett's multiple comparisons test, compared to DMSO; \*\*\*, $P<0.001$ ; \*\*, $P<0.01$ ; \*, $P<0.05$ . **G**, Heatmap of GSEA data indicating the NES of Reactome translation-associated gene sets in each drug or sgRNA treatment condition. Only gene sets with significant FDRs are displayed using the color scale, with those bearing non-significant FDRs indicated in gray. **H**, Control-normalized expression of all translation-associated genes ( $n=48$ ) in each sgRNA and drug treatment condition. Data were analyzed by Welch's  $t$  test, compared to All Genes; \*\*\*, $P<0.001$ ; \*\*, $P<0.01$ .

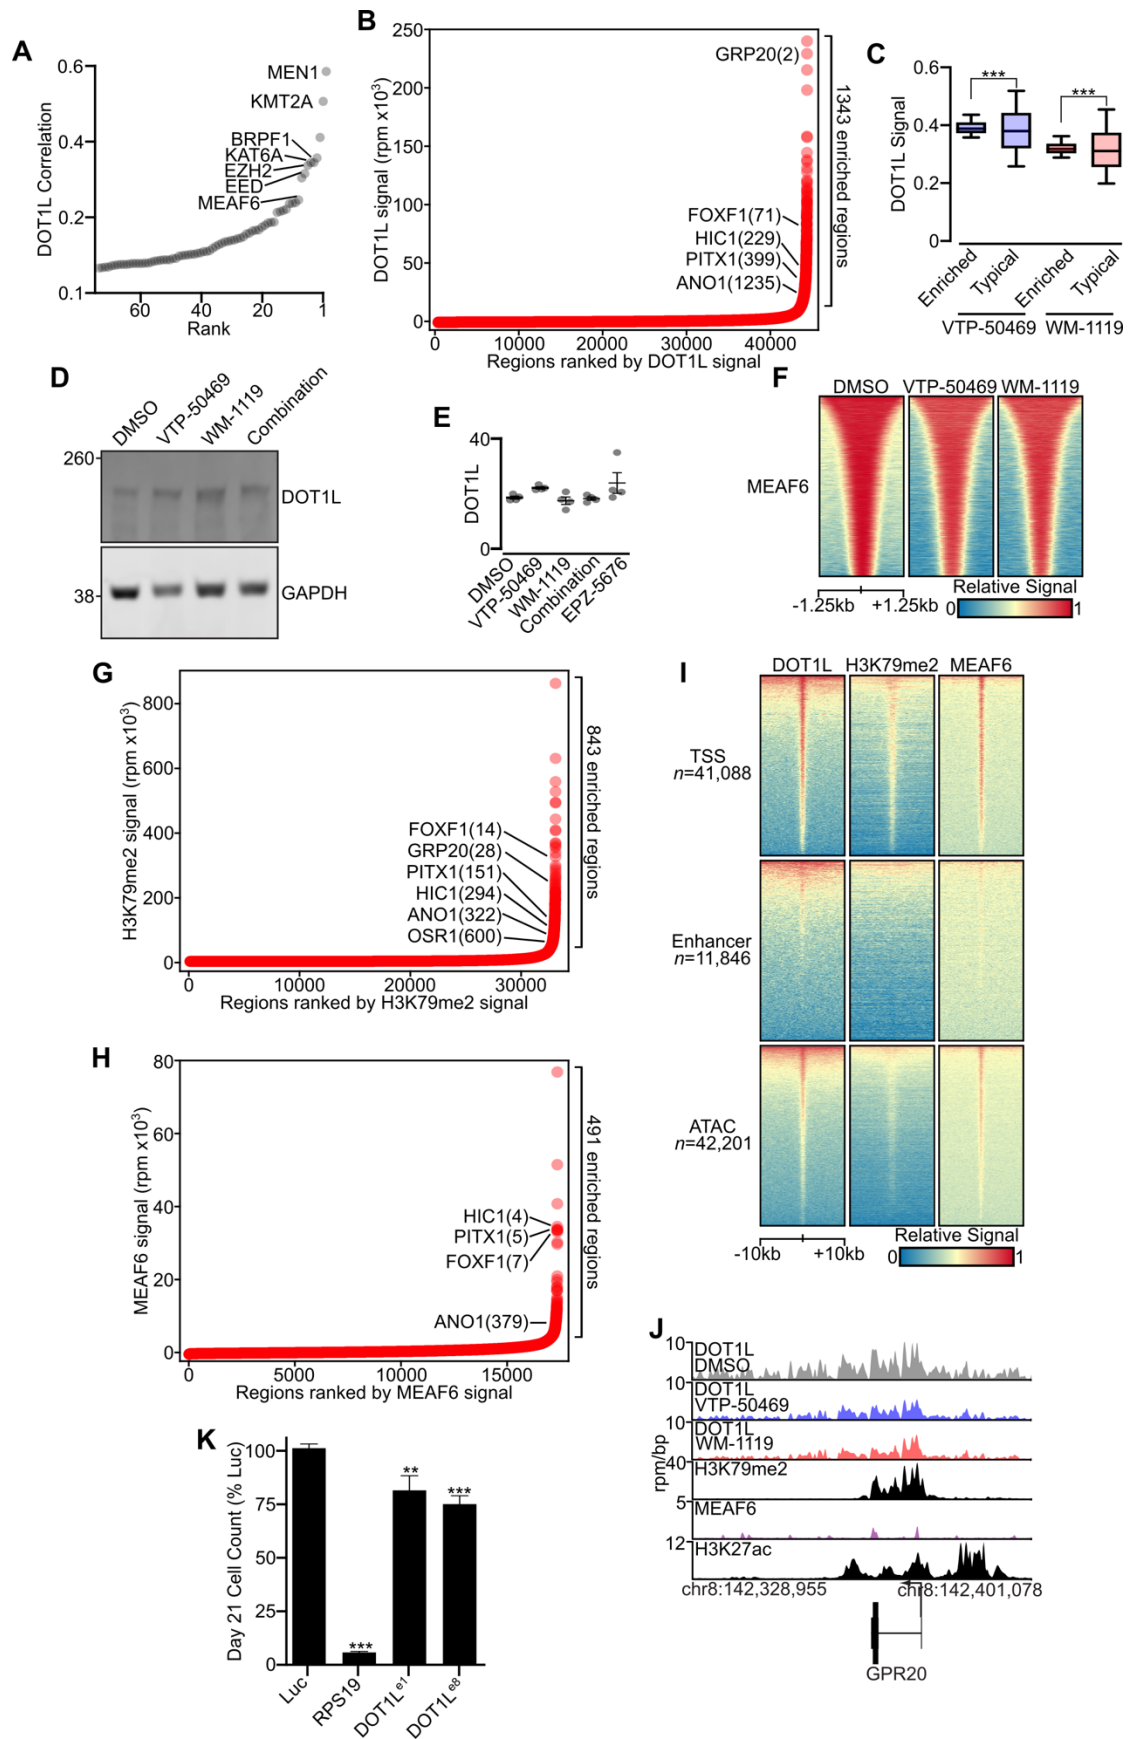

**Figure S6. ChIP-seq of DOT1L, H3K79me2 and MEAF6 and effects of VTP-50469 and WM-1119.** **A**, Top 70 gene dependency correlations of DOT1L in DepMap, with members of Menin-MLL, MOZ and PRC2 complex indicated. **B**, Enriched genomic regions of DOT1L binding. Select GIST-associated genes are indicated. **C**, DMSO-normalized signal for DOT1L in regions showing enriched ( $n=1,343$ ) or typical ( $n=45,256$ ) signal for DOT1L. Data were compared by Welch's  $t$  test; \*\*\*,  $P<0.001$ . **D**, Western blot showing DOT1L signal following 5 days of treatment with the indicated inhibitors. **E**, Levels of DOT1L expression by RNA-seq following 5 days of treatment with the indicated drugs; no significant changes were observed by one-way ANOVA with Dunnett's multiple comparisons test. **F**, Heat maps demonstrating spike-in normalized signal of MEAF6 at MACS-defined peaks ( $n=22,581$ ) in GIST-T1 cells treated with DMSO, VTP-50469 or WM-1119. Scaled read densities  $\pm 1.25$  kb from the peak center are shown in rows. **G-H**, Enriched genomic regions of H3K79me2 and MEAF6 binding. Select GIST-associated genes are labeled. **I**, Heat maps demonstrating genomic localization in GIST-T1 of DOT1L, H3K79me2 and MEAF6 by ChIP-seq. Scaled read densities  $\pm 10$  kb from the TSS, H3K27ac-defined enhancers or ATAC-defined peaks are shown in rows. **J**, Tracks showing regions of genomic occupancy of spike-in normalized DOT1L under the indicated treatments, H3K79me2, MEAF6 and H3K27ac at the *GPR20* locus. **K**, Day 21 GIST-T1 cell count in a growth over time assay comparing sgRNAs targeting two DOT1L exons or Luc or RPS19 as control ( $n=5$  per sgRNAs). Data were analyzed by one-way ANOVA with Dunnett's multiple comparisons test, compared to Luc control; \*\*\*,  $P<0.001$ ; \*\*,  $P<0.01$ .

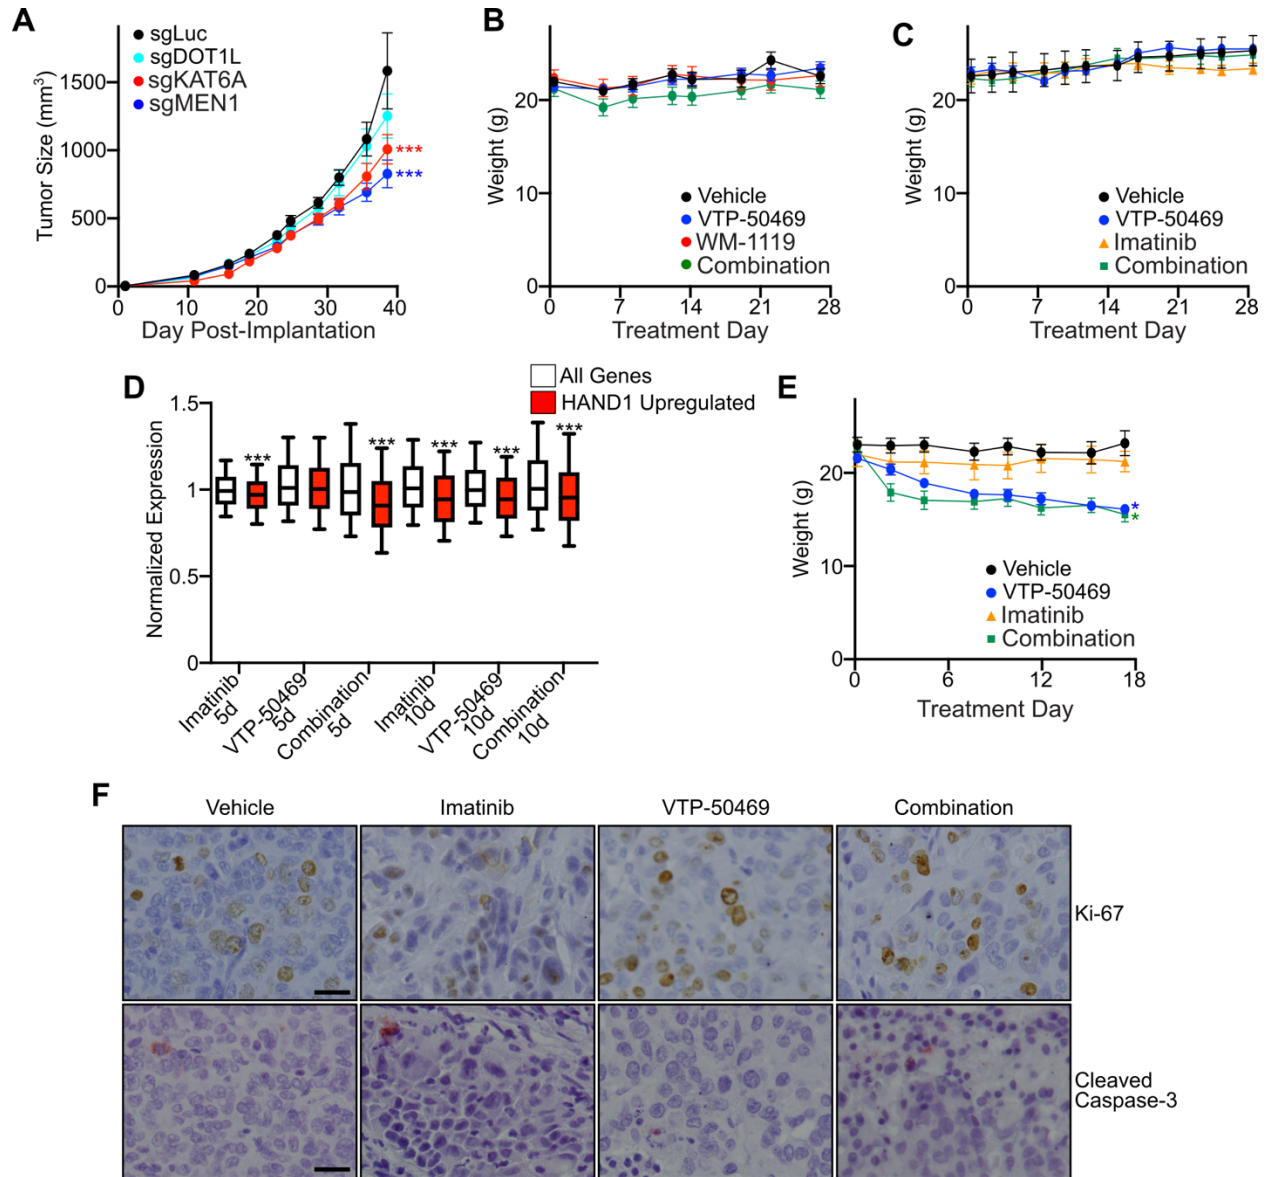

**Figure S7. Effects of sgRNA or drug treatment *in vivo*.** **A**, GIST-T1/Cas9 cells were stably transduced with the indicated sgRNA, selected with puromycin *in vitro* for 14 days, and identical numbers of cells implanted and monitored for growth ( $n=10$  tumors per group). Data were analyzed by two-way ANOVA, compared to sgLuc; \*\*\*, $P<0.001$ . **B**, Weight of mice engrafted with the GIST-T1 cell line and treated for 28 days with WM-1119 (50 mg/kg gavage three times per day, 7d/week;  $n=6$ ), VTP-50469 (0.1% in chow;  $n=5$ ), combination WM-1119 and VTP-50469 ( $n=6$ ) or vehicle control ( $n=5$ ). **C**, Weight of mice engrafted with the GIST-T1 cell line and treated for 28 days with imatinib (50 mg/kg gavage 5d/week;  $n=5$ ), VTP-50469 (0.1% in chow;  $n=4$ ), combination imatinib and VTP-50469 ( $n=5$ ) or vehicle control ( $n=5$ ). **D**, Control-normalized expression of all expressed genes ( $n=7,434$ ) or those whose expression is upregulated by HAND1 ( $n=438$ ) in each treatment group. Data were analyzed by Welch's *t* test, compared All Genes; \*\*\*, $P<0.001$ ; \*\*, $P<0.01$ ; \*, $P<0.05$ . **E**, Weight of mice engrafted with the PG27 PDX and treated for 18 days with imatinib (50 mg/kg gavage 5d/week;  $n=5$ ), VTP-50469 (0.1% in chow;  $n=5$ ), combination imatinib and VTP-50469 ( $n=5$ ) or vehicle control ( $n=5$ ). Data were analyzed by two-way ANOVA, compared to vehicle; \*, $P<0.05$ . **F**, PG27 tumors were harvested at the end of the treatment period and fixed tissues sectioned and evaluated for Ki-67 (top row) and cleaved caspase-3 (bottom row); scale bar = 25 $\mu$ m.

**Table S1. Genome-scale CRISPR screen.** Columns indicate gene name,  $\beta$ -score, *P*-value and FDR.

**Table S2. MEAF6 proximal proteins identified by BioID.**

**Table S3. Oligonucleotide sequences.**

**Table S4. Tumor Measurements.**
